# Supplementary material
Source: Springer Nature journal article supplement (https://www.springermedizin.de/resource/supplementary/12990_2009_234_MOESM3_ESM.pdf/9612850)

### A. Thalamic and ACC recordings

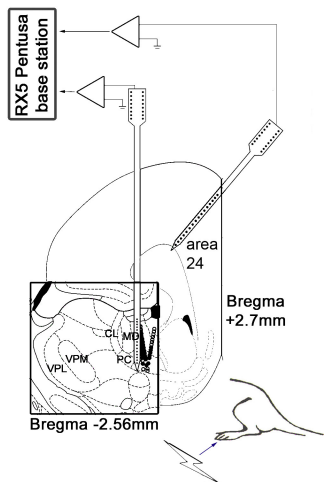

### B. Potentiated thalamic and ACC responses

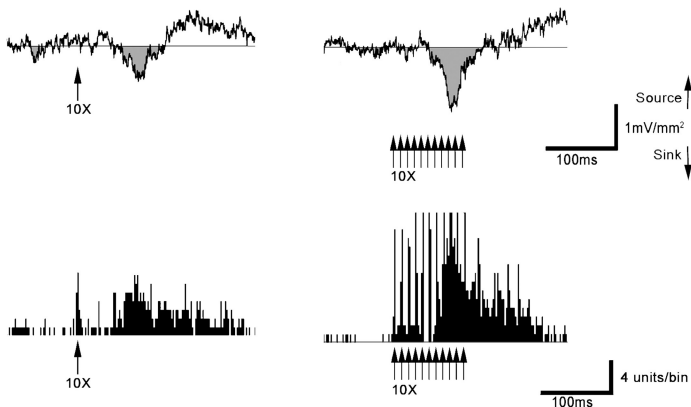

### C. Thalamic stimulation and ACC recording

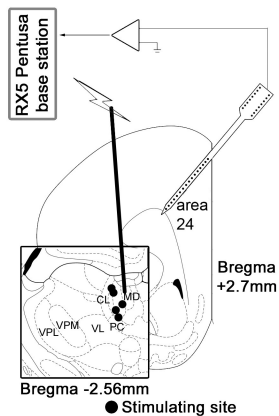

### D. Paired-pulse potentiation in the ACC

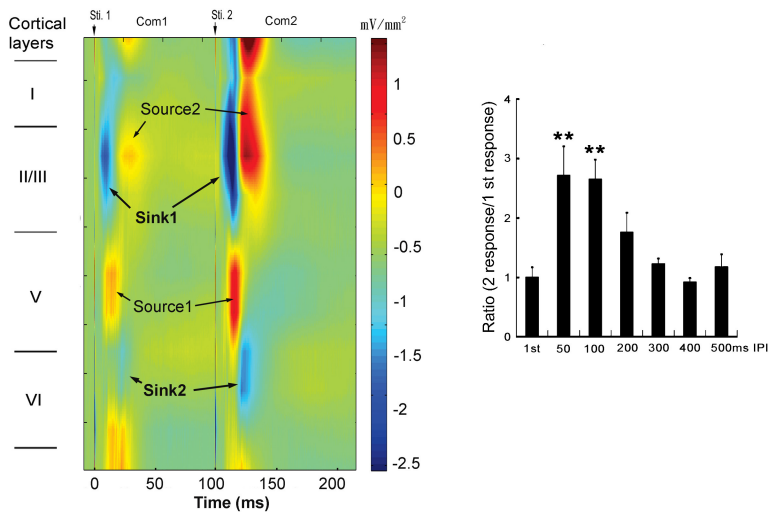

Supplement: MOESM3 [file 9612850]
